# Supplementary material for: Enhanced Symbiotic Characteristics in Bacterial Genomes with the Disruption of rRNA Operon
Source: MDPI journal article supplement (doi:10.3390/biology9120440), 2020-12-03
Supplement: s1 [file s1]

**Supplementary Table S2.** List of genera with the conservation of rRNA operon disruption.

| Genus                  | Unlinked genomes* | Genome size (average, bp) | rRNA copy number |     | Characteristics                                  | Habitat (host)          | Reference |
|------------------------|-------------------|---------------------------|------------------|-----|--------------------------------------------------|-------------------------|-----------|
|                        |                   |                           | 16S              | 23S |                                                  |                         |           |
| <i>Anaplasma</i>       | 8                 | 1349657.5                 | 1                | 1   | Pathogen (humans, mammals; anaplasmosis)         | Ticks                   | [1-3]     |
| <i>Borrelia</i>        | 20                | 1192776.1                 | 1                | 1   | Pathogen (humans, mammals; relapsing fever)      | Ticks, lice             | [4-6]     |
| <i>Borrelia</i>        | 16                | 1265183.6                 | 1                | 1~2 | Pathogen (humans; lyme disease)                  | Ticks, lice             | [4,5,7-9] |
| <i>Brachyspira</i>     | 9                 | 2976921.6                 | 1                | 1   | Pathogen (humans, mammals)                       | Various animals         | [10-14]   |
| <i>Buchnera</i>        | 24                | 592061.1                  | 1                | 1   | Symbiont (aphids)                                | Aphids                  | [15]      |
| <i>Dehalococcoides</i> | 25                | 1403003.4                 | 1                | 1   | Organohalide respiration                         | Environmental sediments | [16]      |
| <i>Ehrlichia</i>       | 15                | 1260075.1                 | 1                | 1   | Pathogen (humans, mammals; ehrlichiosis)         | Ticks                   | [17-20]   |
| <i>Eperythrozoon A</i> | 6                 | 687613.3                  | 1                | 1   | Pathogen (mammals)                               | Arthropods              | [21]      |
| <i>Gimesia</i>         | 6                 | 7922255.7                 | 2                | 1   | Isolated from ocean (not characterized)          | Ocean                   | [22]      |
| <i>Helicobacter</i>    | 175               | 1638038.3                 | 1~2              | 1~2 | Pathogen (humans, mammals)                       | Humans, mammals         | [23-25]   |
| <i>Leptospira</i>      | 29                | 4452983.9                 | 2                | 2   | Pathogen (humans, mammals; leptospirosis)        | Stagnant water, mammals | [26]      |
| <i>Orientia</i>        | 8                 | 2171624.8                 | 1                | 1   | Pathogen (humans; typhus, Tsutsugamushi disease) | Mites                   | [27,28]   |
| <i>Rickettsia</i>      | 68                | 1270779.6                 | 1                | 1   | Pathogen (humans; typhus)                        | Arthropods, nematodes   | [28]      |
| <i>Thermus</i>         | 15                | 2253012.2                 | 2                | 2   | High temperature tolerance                       | Hot water               | [29]      |
| <i>TM7x</i>            | 4                 | 770656.0                  | 1                | 1   | Pathogen (bacteria)                              | Bacteria                | [30]      |
| <i>Wolbachia</i>       | 23                | 1308337.4                 | 1                | 1   | Symbiont (insects)                               | Nematodes               | [31,32]   |

\* Genera with only unlinked rRNA operons and with four or more genomes were included.

## References

1. Munderloh, U.G.; Blouin, E.F.; Kocan, K.M.; Ge, N.L.; Edwards, W.L.; Kurtti, T.J. Establishment of the tick (Acari: Ixodidae)-borne cattle pathogen *Anaplasma marginale* (Rickettsiales: Anaplasmataceae) in tick cell culture. *Journal of medical entomology* **1996**, *33*, 656–664.
2. Stuenkel, S. *Anaplasma phagocytophilum*-the most widespread tick-borne infection in animals in Europe. *Veterinary research communications* **2007**, *31*, 79–84.
3. Ohashi, N.; Inayoshi, M.; Kitamura, K.; Kawamori, F.; Kawaguchi, D.; Nishimura, Y.; Naitou, H.; Hiroi, M.; Masuzawa, T. *Anaplasma phagocytophilum*-infected ticks, Japan. *Emerging infectious diseases* **2005**, *11*, 1780.
4. Barbour, A.G.; Hayes, S.F. Biology of *Borrelia* species. *Microbiological reviews* **1986**, *50*, 381.
5. Adeolu, M.; Gupta, R.S. A phylogenomic and molecular marker based proposal for the division of the genus *Borrelia* into two genera: The emended genus *Borrelia* containing only the members of the relapsing fever *Borrelia*, and the genus *Borrelia* gen. nov. containing the members of the Lyme disease *Borrelia* (*Borrelia burgdorferi* sensu lato complex). *Antonie Van Leeuwenhoek* **2014**, *105*, 1049–1072.
6. Krause, P.J.; Narasimhan, S.; Wormser, G.P.; Rolland, L.; Fikrig, E.; Lepore, T.; Barbour, A.; Fish, D. Human *Borrelia miyamotoi* infection in the United States. *The New England journal of medicine* **2013**, *368*, 291.
7. Baranton, G.; Postic, D.; Saint Girons, I.; Boerlin, P.; Piffaretti, J.-C.; Assous, M.; Grimont, P.A. Delineation of *Borrelia burgdorferi* sensu stricto, *Borrelia garinii* sp. nov., and group VS461 associated with Lyme borreliosis. *International Journal of Systematic and Evolutionary Microbiology* **1992**, *42*, 378–383.
8. Pritt, B.S.; Respcio-Kingry, L.B.; Sloan, L.M.; Schrieffer, M.E.; Replogle, A.J.; Bjork, J.; Liu, G.; Kingry, L.C.; Mead, P.S.; Neitzel, D.F. *Borrelia mayonii* sp. nov., a member of the *Borrelia burgdorferi* sensu lato complex, detected in patients and ticks in the upper midwestern United States. *International journal of systematic and evolutionary microbiology* **2016**, *66*, 4878.
9. Schutzer, S.E.; Fraser-Liggett, C.M.; Qiu, W.-G.; Kraiczy, P.; Mongodin, E.F.; Dunn, J.J.; Luft, B.J.; Casjens, S.R. Whole-genome sequences of *Borrelia bissetii*, *Borrelia valaisiana*, and *Borrelia spielmanii*. *Am Soc Microbiol*: 2012.
10. Bellgard, M.I.; Wanchanthuek, P.; La, T.; Ryan, K.; Moolhuijzen, P.; Albertyn, Z.; Shaban, B.; Motro, Y.; Dunn, D.S.; Schibeci, D. Genome sequence of the pathogenic intestinal spirochete *Brachyspira hyodysenteriae* reveals adaptations to its lifestyle in the porcine large intestine. *PLoS ONE* **2009**, *4*.
11. Martínez-Lobo, F.J.; Hidalgo, Á.; García, M.; Argüello, H.; Naharro, G.; Carvajal, A.; Rubio, P. First identification of “*Brachyspira hampsonii*” in wild European waterfowl. *PLoS ONE* **2013**, *8*.
12. Pati, A.; Sikorski, J.; Gronow, S.; Munk, C.; Lapidus, A.; Copeland, A.; Del Tio, T.G.; Nolan, M.; Lucas, S.; Chen, F. Complete genome sequence of *Brachyspira murdochii* type strain (56-150 T). *Standards in genomic sciences* **2010**, *2*, 260–269.
13. Hampson, D.J. The spirochete *Brachyspira pilosicoli*, enteric pathogen of animals and humans. *Clinical microbiology reviews* **2018**, *31*, e00087–e00017.
14. Häfström, T.; Jansson, D.S.; Segerman, B. Complete genome sequence of *Brachyspira intermedia* reveals unique genomic features in *Brachyspira* species and phage-mediated horizontal gene transfer. *BMC genomics* **2011**, *12*, 395.
15. Moran, N.A.; Mira, A. The process of genome shrinkage in the obligate symbiont *Buchnera aphidicola*. *Genome biology* **2001**, *2*, research0054. 0051.
16. Löffler, F.E.; Yan, J.; Ritalahti, K.M.; Adrian, L.; Edwards, E.A.; Konstantinidis, K.T.; Müller, J.A.; Fullerton, H.; Zinder, S.H.; Spormann, A.M. *Dehalococcoides mccartyi* gen. nov., sp. nov., obligately organohalide-respiring anaerobic bacteria relevant to halogen cycling and bioremediation, belong to a novel bacterial class, *Dehalococcoidia* classis nov., order *Dehalococcoidales* ord. nov. and family *Dehalococcoidaceae* fam. nov., within the phylum *Chloroflexi*. *International journal of systematic and evolutionary microbiology* **2013**, *63*, 625–635.
17. Anderson, B.; Dawson, J.; Jones, D.; Wilson, K. *Ehrlichia chaffeensis*, a new species associated with human ehrlichiosis. *Journal of clinical microbiology* **1991**, *29*, 2838–2842.

18. Aguiar, D.M.; Cavalcante, G.T.; Pinter, A.; Gennari, S.M.; Camargo, L.M.A.; Labruna, M.B. Prevalence of Ehrlichia canis (Rickettsiales: Anaplasmataceae) in dogs and Rhipicephalus sanguineus (Acari: Ixodidae) ticks from Brazil. *Journal of medical entomology* **2007**, *44*, 126–132.
19. Frutos, R.; Viari, A.; Ferraz, C.; Morgat, A.; Eychenié, S.; Kandassamy, Y.; Chantal, I.; Bensaid, A.; Coissac, E.; Vachieri, N. Comparative genomic analysis of three strains of Ehrlichia ruminantium reveals an active process of genome size plasticity. *Journal of bacteriology* **2006**, *188*, 2533–2542.
20. Kawahara, M.; Ito, T.; Suto, C.; Shibata, S.; Rikihisa, Y.; Hata, K.; Hirai, K. Comparison of Ehrlichia muris strains isolated from wild mice and ticks and serologic survey of humans and animals with E. muris as antigen. *Journal of clinical microbiology* **1999**, *37*, 1123–1129.
21. Neimark, H.; Hoff, B.; Ganter, M. Mycoplasma ovis comb. nov. (formerly Eperythrozoon ovis), an eperythrocyclic agent of haemolytic anaemia in sheep and goats. *International journal of systematic and evolutionary microbiology* **2004**, *54*, 365–371.
22. Scheuner, C.; Tindall, B.J.; Lu, M.; Nolan, M.; Lapidus, A.; Cheng, J.-F.; Goodwin, L.; Pitluck, S.; Huntemann, M.; Liolios, K. Complete genome sequence of Planctomyces brasiliensis type strain (DSM 5305 T), phylogenomic analysis and reclassification of Planctomycetes including the descriptions of Gimesia gen. nov., Planctopirus gen. nov. and Rubinisphaera gen. nov. and emended descriptions of the order Planctomycetales and the family Planctomycetaceae. *Standards in genomic sciences* **2014**, *9*, 10.
23. Suerbaum, S.; Michetti, P. Helicobacter pylori infection. *New England Journal of Medicine* **2002**, *347*, 1175–1186.
24. Harper, C.G.; Whary, M.T.; Feng, Y.; Rhinehart, H.L.; Wells, R.S.; Xu, S.; Taylor, N.S.; Fox, J.G. Comparison of diagnostic techniques for Helicobacter cetorum infection in wild Atlantic bottlenose dolphins (Tursiops truncatus). *Journal of clinical microbiology* **2003**, *41*, 2842–2848.
25. Dailidienė, D.; Dailidienė, G.; Ogura, K.; Zhang, M.; Mukhopadhyay, A.K.; Eaton, K.A.; Cattoli, G.; Kusters, J.G.; Berg, D.E. Helicobacter acinonychis: Genetic and rodent infection studies of a Helicobacter pylori-like gastric pathogen of cheetahs and other big cats. *Journal of bacteriology* **2004**, *186*, 356–365.
26. Adler, B.; de la Peña Moctezuma, A. Leptospira and leptospirosis. *Veterinary microbiology* **2010**, *140*, 287–296.
27. Seong, S.-Y.; Choi, M.-S.; Kim, I.-S. Orientia tsutsugamushi infection: Overview and immune responses. *Microbes and Infection* **2001**, *3*, 11–21.
28. Georgiades, K.; Merhej, V.; El Karkouri, K.; Raoult, D.; Pontarotti, P. Gene gain and loss events in Rickettsia and Orientia species. *Biology direct* **2011**, *6*, 6.
29. Omelchenko, M.V.; Wolf, Y.I.; Gaidamakova, E.K.; Matrosova, V.Y.; Vasilenko, A.; Zhai, M.; Daly, M.J.; Koonin, E.V.; Makarova, K.S. Comparative genomics of Thermus thermophilus and Deinococcus radiodurans: Divergent routes of adaptation to thermophily and radiation resistance. *BMC evolutionary biology* **2005**, *5*, 57.
30. Bor, B.; McLean, J.S.; Foster, K.R.; Cen, L.; To, T.T.; Serrato-Guillen, A.; Dewhirst, F.E.; Shi, W.; He, X. Rapid evolution of decreased host susceptibility drives a stable relationship between ultrasmall parasite TM7x and its bacterial host. *Proceedings of the National Academy of Sciences* **2018**, *115*, 12277–12282.
31. Parvizi, P.; Benlarbi, M.; Ready, P. Mitochondrial and Wolbachia markers for the sandfly Phlebotomus papatasi: Little population differentiation between peridomestic sites and gerbil burrows in Isfahan province, Iran. *Medical and veterinary entomology* **2003**, *17*, 351–362.
32. Hedges, L.M.; Brownlie, J.C.; O'Neill, S.L.; Johnson, K.N. Wolbachia and virus protection in insects. *Science* **2008**, *322*, 702–702.
