# Supplementary figures and images for: Enhanced Symbiotic Characteristics in Bacterial Genomes with the Disruption of rRNA Operon
Source: MDPI journal article supplement (doi:10.3390/biology9120440), 2020-12-03

**A**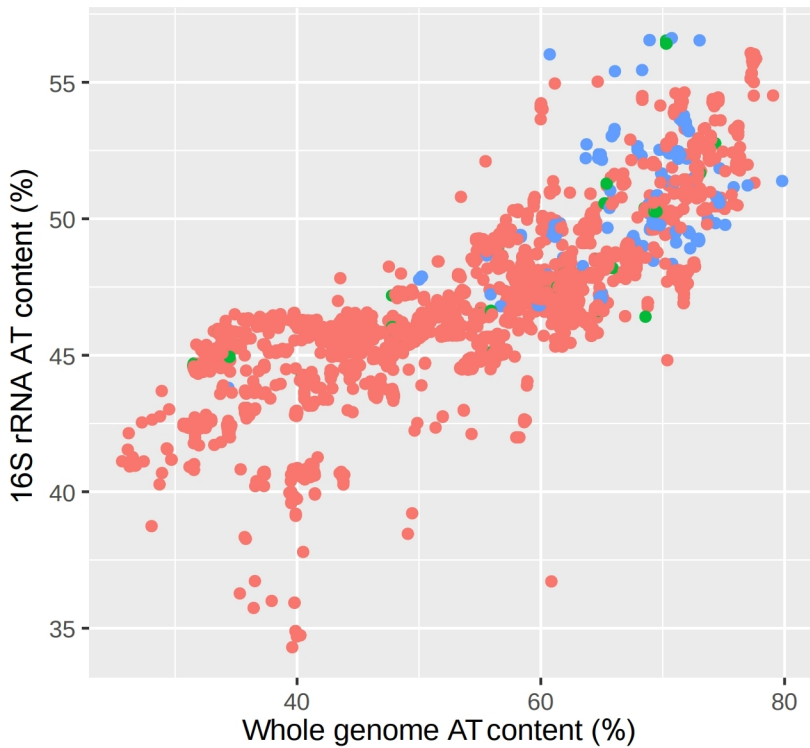**B**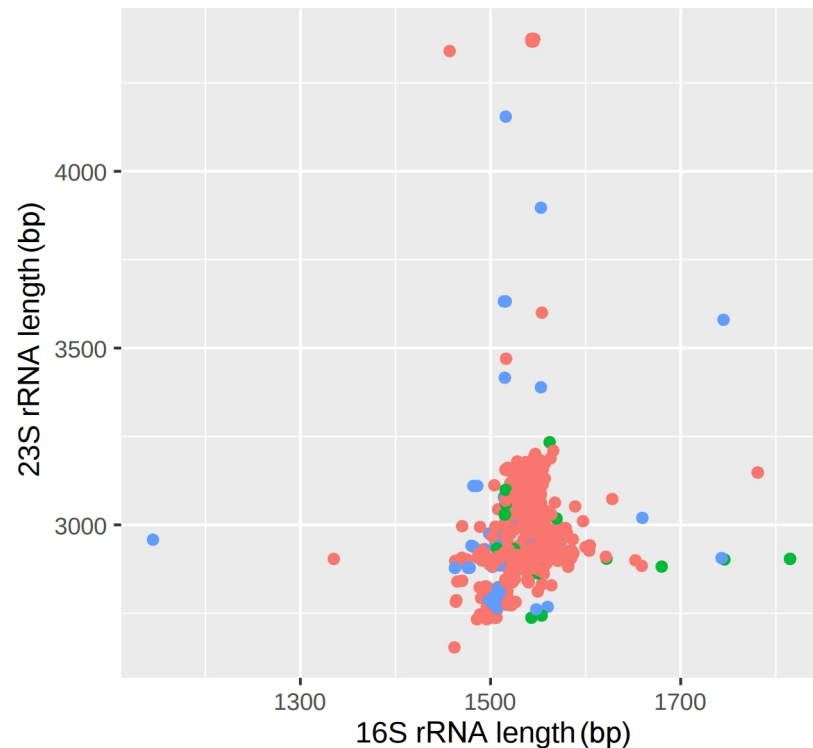**C**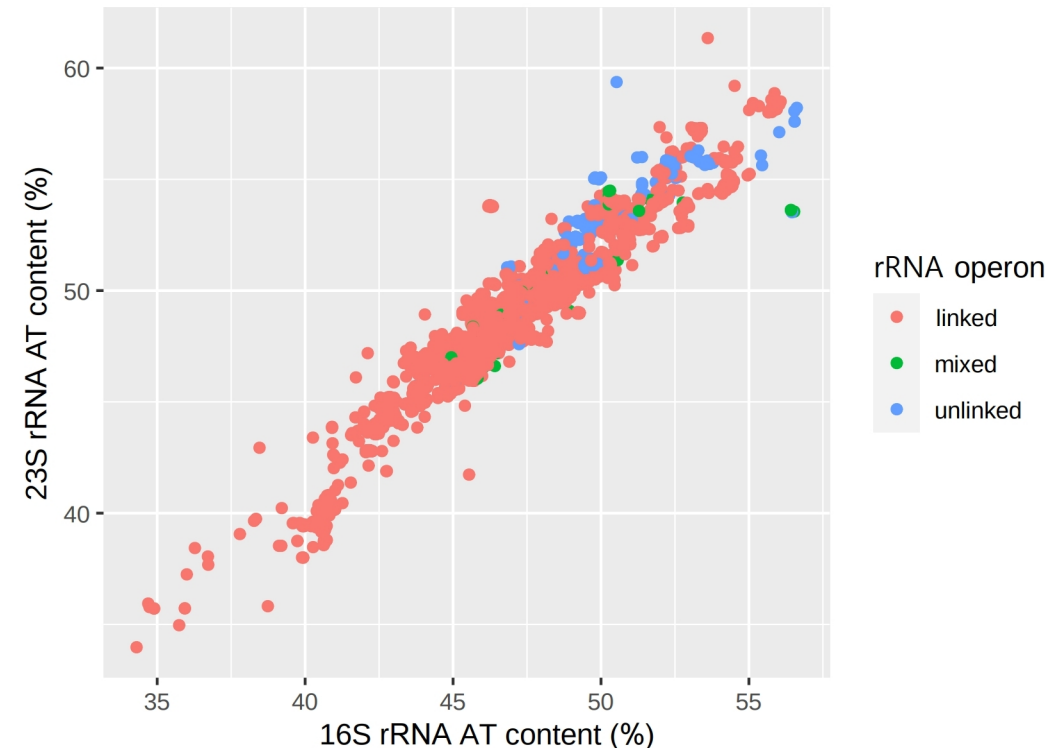

Supplement: s1 [file s1]
